# Supplementary material
Source: Springer Nature journal article supplement (https://www.springermedizin.de/resource/supplementary/12958_2012_987_MOESM2_ESM.pdf/9566568)

**A**

Negative control      C-src siRNA      Marker      Blank control

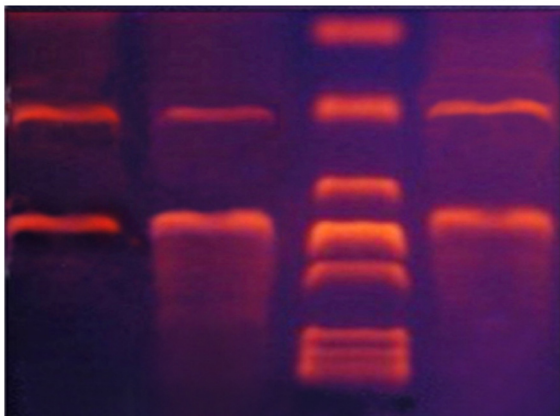**c-src** **$\beta$ -actin**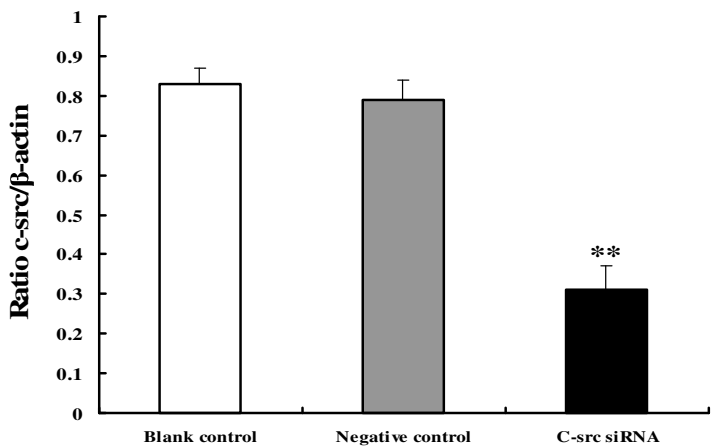**B**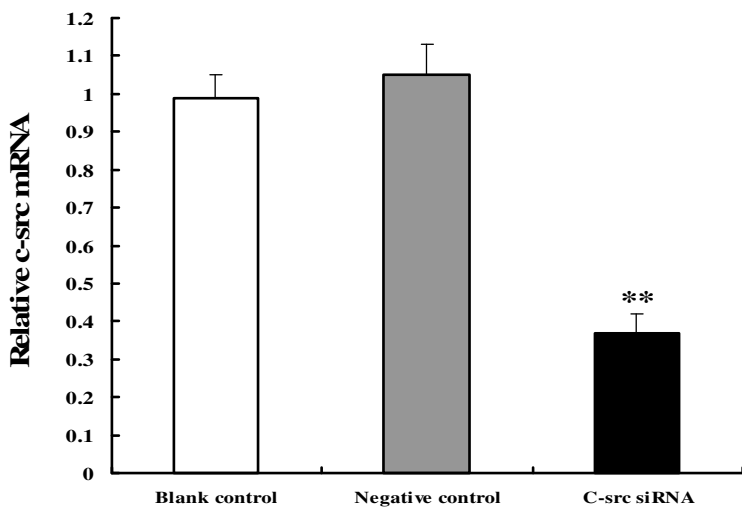

Supplement: MOESM2 [file 9566568]
